# Supplementary material for: Heterogeneity in the expression and subcellular localization of POLYOL/MONOSACCHARIDE TRANSPORTER genes in Lotus japonicus
Source: PLoS One. 2017 Sep 20;12(9):e0185269. doi: 10.1371/journal.pone.0185269 (PMC5607196; doi:10.1371/journal.pone.0185269)
Supplement: S2 Table — (XLSX) [file pone.0185269.s003.xlsx]

## Sheet: Table S
S2 Table. The LjPLT genes identified in this study
Gene ID	*Lotus japonicus ID 3.0	*Lotus japonicus ID 2.5	Predicted aa length	Revised aa length	Chr No.	intron	**Predicted TMHs	***Gene ID in Kalliampakou et al., 2011 and (Acc. No. in NCBI)***	Clade in the phylogenetic tree	Revised amino acid sequences
LjPLT1	Lj1g3v3404510.1	chr1.CM0113.1760.r2.m	154	521	1	2	6 + 6		I	MAEGRGIEAAAHKSLEDFDPQRKPKSSKFAFACAILASMTSILLGYDIGVMSGAVIYIKRDLKLSDVQIEILVGIINLHSLVGSCLAGRTSDWIGRRYTIVLAGGIFFTGALLMGFSPNYSFLMFARFIAGIGIGYALMIAPVYTAEVSPASSRGFLTSFPEVFINGGILLGYISNYGFSKLSLSLGWRLMLGIGAVPSVILAVGVLAMPESPRWLVMKGRLGEATKVLNRTSDSKEEAQLRLAEIKAAAGIPESCTDDVVHITKNSHGGGGSGGEVWKELFLHPTPAVRHILIAALGIHFFQQASGIDAVVLYSPTIFRKAGIESDTEQLLATVAVGFCKTFFILVATFLLDRVGRRPLLLTSVGGMVISLFTLAASLTVIDHANHGKVMWAVGLSIA…
LjPLT2	Lj2g3v0781590.1	No Hits	521		2	2	6 + 6		IV
LjPLT3	Lj2g3v1758430.1	chr2.LjT34P04.70.r2.d	510		2	1	6 + 6		II
	Lj2g3v1778720.1	chr2.LjT34P04.70.r2.d	510		2	1
LjPLT4	Lj2g3v1758440.1	chr2.LjT34P04.80.r2.d	507		2	1	6 + 6	LjPLT2 (AM084329)	II
	Lj2g3v1778740.1	chr2.LjT34P04.80.r2.d	381
LjPLT5	Lj2g3v1758450.1	chr2.LjT34P04.110.r2.d	494		2	1	6 + 6		II
LjPLT6	Lj3g3v3338420.1	chr3.CM0091.860.r2.m	527		3	2	6 + 6	LjPLT4 (AM084331)	I
LjPLT7	Lj3g3v3386830.4	chr3.CM0091.2010.r2.m	231	520	3	2	6 + 5		I	MAEGEAAAGKSLRDFDPQKKPKRNKFALACAILASMTSILLGYDIGVMSGAVIYIKRDLKISDVQIEILSGIMNIYSPIGSYIAGRTSDWIGRRYTIVLAGLIFFVGAILMGFSPNYAFLMFGRFVAGVGIGFAFLIAPVYTSEISPTLSRGFLTSLPEVFLNAGILIGYISNYTFSKLPLRLGWRLMLGIGAIPSIFLAVVVLAMPESPRWLVAKGRIGEARKVLNKISDSKEEAHLRLVDIKHQTGIPEDCNDEVVQLNNQVQVQGKGVWRELFLHPTPAVRHIFIASLGIHFFAQATGIDAVVLYSPRIFEKAGIKSDTYKLLATVAVGFVKTLSILLATFLLDRVGRRVLLLTSVGGLVLSLMTLGASLTVVDHSHVTWALGLSIAAVLSYVATF…
LjPLT8	Lj3g3v2807920.1	chr3.CM0160.30.r2.m	450	523	3	1	6 + 6		III	MEFQEHGNGKVGFAEIHLGAKNKYKRMNSELPEDHDDDVLHQEARRNRTRKYVIACAIFASLNNVLLGYDVGVMSGAVIFIKEDLKISEVKEEFLVGILSIVSLLGSLGGGRTSDIIGRKWTMALAAVVFQIGALIMTLAPSFTVLLIGRLLAGVGIGFGVMISPIYIAEISPNTTRGSLTAFPEIFINIGILLGYVSNYAFSGFSPHINWRIMLGVGILPSVFIGFALFIIPESPRWLVMQNRIEEARSVLLKTNENEKEVEERLAEIQKAAEKFEDKPVWRELLFPSPSLRRMLITGIGIQCFQQISGIDATVYYSPEIFKAAGIEDNSRLLAATVAVGVTKTLFIVIAIILIDKLGRKPLLLISTIGMTACLLSIGATLSLFGQGSFVIALSILFV…
LjPLT9	Lj4g3v0937740.1	chr4.CM0165.640.r2.m	465	492	4	1	6 + 6		II	MEHGDGKEDQNITKINKYALACAIVASMVSIISGYDTGVMSGAMLFIKEDMEISDTQQEVLAGILNLCALVGSLVAGRTSDYIGRRYTIFLASVLFMLGAVLMGYGPNYTILMVGRCVGGLGVGFALMIAPVYSAEISSASSRGFLTSLPEFCIGIGILLGYISNYFLGKLTLKLGWRLMLGIAALPSLALSLGILTMPESPRWLVMQGRLGSAKKVLLQVSNTTQEAELRFREIKVAAGFDENCNDEIVKQPQKSHLGEGVWKELLLRPTPPVRWMLIAAVGIHFFEHATGIEAVMLYSPRIFKKAGVTNKDKLLLATIGVGLTKITFLIIASFLLDKVGRRRLLQISTGGMVCALTLLGFSLTMVDHSNEKLLWALSLSILATYSYVAFFNIGLGPV…
LjPLT10	Lj4g3v0937780.1	chr4.CM0165.670.r2.m	135	492	4	1	6 + 6		II	MEKGGNEDQASTLNKYALGCVIVASMVAIISGYDTGVMSGALLFIKEDIGISDTEQEILAGILNLCALVGCLVAGRTSDYIGRRYTILLASSLFLIGAVFMGYGPNYVILMIGRCVCGVGVGFALTTAPVYAAEISSASYRGFLSSLPELCIGLGIFTGYISNYFLGKLALKLGWRLMLGLAAIPSLGLTLGILTMPESPRWLVMQGRLRDAKNVLLEVSNTTEEAELRFRDIIVAAGFDENCNDEVVNQPQKSHQGEGVWKELFLRPTPPVRRMLIAAIGIHFFEHATGIEAVMLYSPRIFKKAGVTTKDKLLLATIGVGLTKIVFLSISTFLLDRVGRRRLLQISTTGMIFGLTILGFSLTIVDHSSKKLLWALSLSIVATYTFVAFYNVGLAPVTW…
LjPLT11	Lj4g3v0937820.2	chr4.CM0165.690.r2.m	490		4	1	6 + 6	LjPLT1 (AM084328)	II
LjPLT12	Lj6g3v2044540.1	chr6.CM0336.370.r2.d	387	497	6	1	6 + 6		III	MTSDLTEAEEEDEGGLQTSNYDTKKYIIACAIFASLNSVLLGYDIGVMSGAVLFIQDDLKITDVQVEVLVGILSIISLLGSLAGGKTSDAIGRKWTIGLAAIIFQTGGAVMALAPSFKVLMIGRLLAGVGIGFGVMIAPVYIAEISPAIARGSLTSFPEICINLGILLGYISNYAFSGLPAHISWRIMLGVGLLPSVVIAVALFFIPESPRWLVVQNRIEEARLVLLKINASEKEAEEKLQEIQVAAGSANTENYEPKAVWREIFCPSPPVRRMLITGCGIQCFQQITGIDTTVYYSPTIFKNAGITGKSEVLAATVAVGFTKTLFILVAIMLIDKLGRKPLLYASTIGMTVSLFSLSFSLAFLSHAKIGITLAIIAVCGNVASFSVGIGPICWVLTSE…
LjPLT13	Lj0g3v0300849.1	LjSGA_126986	534		unknown	1	6 + 6		III
LjPLT14	Lj0g3v0332609.1	LjSGA_058216 & LjSGA_143580	264	501	unknown	1	6 + 6	LjPLT3(AM084330)	II	MSMEEKKIENGSGDFGDSHKRLNMYACASVVAASVIFALYGYVMAVMTGVLLFIKEDLQLSDLQVQFSVGLLHMSALPACMTAGRIVDYIGRRYTIILTAIIFLVGSVLMGYGPSYPILMIGLSISGIGLGFSLIVAPVYCAEISPPSHRGFLTSFLEVSTNAGIALGYVSNYFFGKLSIRLGWRLMLVVHAVPSLALVALMLNWVESPRWLVMQGRVGEARKVLLLVSNTKEEAEQRLKEIKVAVGIDEKCTQDIVQVPNRTRNGGGAFREMFCKPTPPVRRILIAAVGVHAFQQLSGVGAILLYCPRIFETIGVTDQSKMLLATVGMGLSKLVFAVMSVFLLDRVGRRLLLLISSGVMAVSLLGLGSVLTLVENSNRENLGWALGFAIVATYTYVAF…
pseudogene ?	Lj4g3v3071660.1+Lj4g3v3071670.1	LjSGA_013172, partial	436				no complete CDS		IV	MDTNVNGKPNALNKFTLLCALLASANSILLGYDIGVMSGAAMLIRENLQISRVQEELLVGTLNVFSLIGSLAAGKTSDWIGRRYTIVLAASTFLAGAIFMSLAPSFPFILAATPSXIAPLYTVELSPAMSRGFLTSLPEVFITVGILLGYIVNYALATLPLHLGWRIMLPQEAELRLQEIIKASAHGPEAGDWHGQGAWKELLLRPSRPVRRMLVSAIGLNFFMQASGNDAVIYYSPEVFKAARIHNKKQLFGVNVIMGLAKSSCVLLSALYLDKFGRRPLLLLGSSGLAVSLSMLGLGSKILNGSARKPVWTIVLCIVAVCADASFFSIGLGPITWVYSSEIFPTRLRAQGSSIAISVNRLVSGVVSMTFLSISKKITFGGMFLVLAGIMVVATAFFY…
*, http://www.kazusa.or.jp/lotus/
**, The membrane spanning regions of the PLT proteins were predicted by HMMTOP and Phobius software
***, Kalliampakou KI, Kouri ED, Boleti H, Pavli O, Maurousset L, Udvardi MK, Katinakis P, Lemoine R, Flemetakis E: Cloning and functional characterization of LjPLT4, a plasma membrane xylitol H(+)- symporter from Lotus japonicus. Mol Membr Biol 2011, 28(1):1-13.
